# Supplementary material for: Efficacy and Safety of Nivolumab Plus Ipilimumab versus Sunitinib in First-line Treatment of Patients with Advanced Sarcomatoid Renal Cell Carcinoma
Source: Oxford University Press journal article supplement (doi:10.1158/1078-0432.ccr-20-2063), 2020-09-01
Supplement: 10780432ccr202063-sup-244195_2_supp_6505246_qf83gq.docx [file 10780432ccr202063-sup-244195_2_supp_6505246_qf83gq.docx]

**Table S1.**

ORR in patients with sRCC and I/P-risk disease, per IRRC, by central or local pathology review.

|  | **Central pathology review** | | **Local pathology reports** | |
| --- | --- | --- | --- | --- |
|  | **NIVO+IPI**  (*N* = 43) | **SUN**  (*N* = 40) | **NIVO+IPI**  (*N* = 60) | **SUN**  (*N* = 52) |
| Confirmed ORR (95% CI), %  *P* value | 60 (44–75) | 25 (13–41) | 57 (43–69) | 21 (11–35) |
| <0.0001 | | 0.0001 | |
| Best overall response, *n* (%)a  Complete response  Partial response  Stable disease  Progressive disease  Unable to determine | 5 (12)  21 (49)  8 (19)  8 (19)  1 (2) | 2 (5)  8 (20)  15 (38)  11 (28)  4 (10) | 13 (22)  21 (35)  6 (10)  14 (23)  5 (8) | 0  11 (21)  22 (42)  12 (23)  7 (13) |

aBest overall response was not reported for one patient assessed by local pathology reports and randomized to NIVO+IPI.
