# Supplementary material for: Efficacy and Safety of Nivolumab Plus Ipilimumab versus Sunitinib in First-line Treatment of Patients with Advanced Sarcomatoid Renal Cell Carcinoma
Source: Oxford University Press journal article supplement (doi:10.1158/1078-0432.ccr-20-2063), 2020-09-01
Supplement: 10780432ccr202063-sup-244195_2_supp_6505247_qf83gm.docx [file 10780432ccr202063-sup-244195_2_supp_6505247_qf83gm.docx]

**Figure S1.**

Post hoc identification of patients with sRCC in CheckMate214.
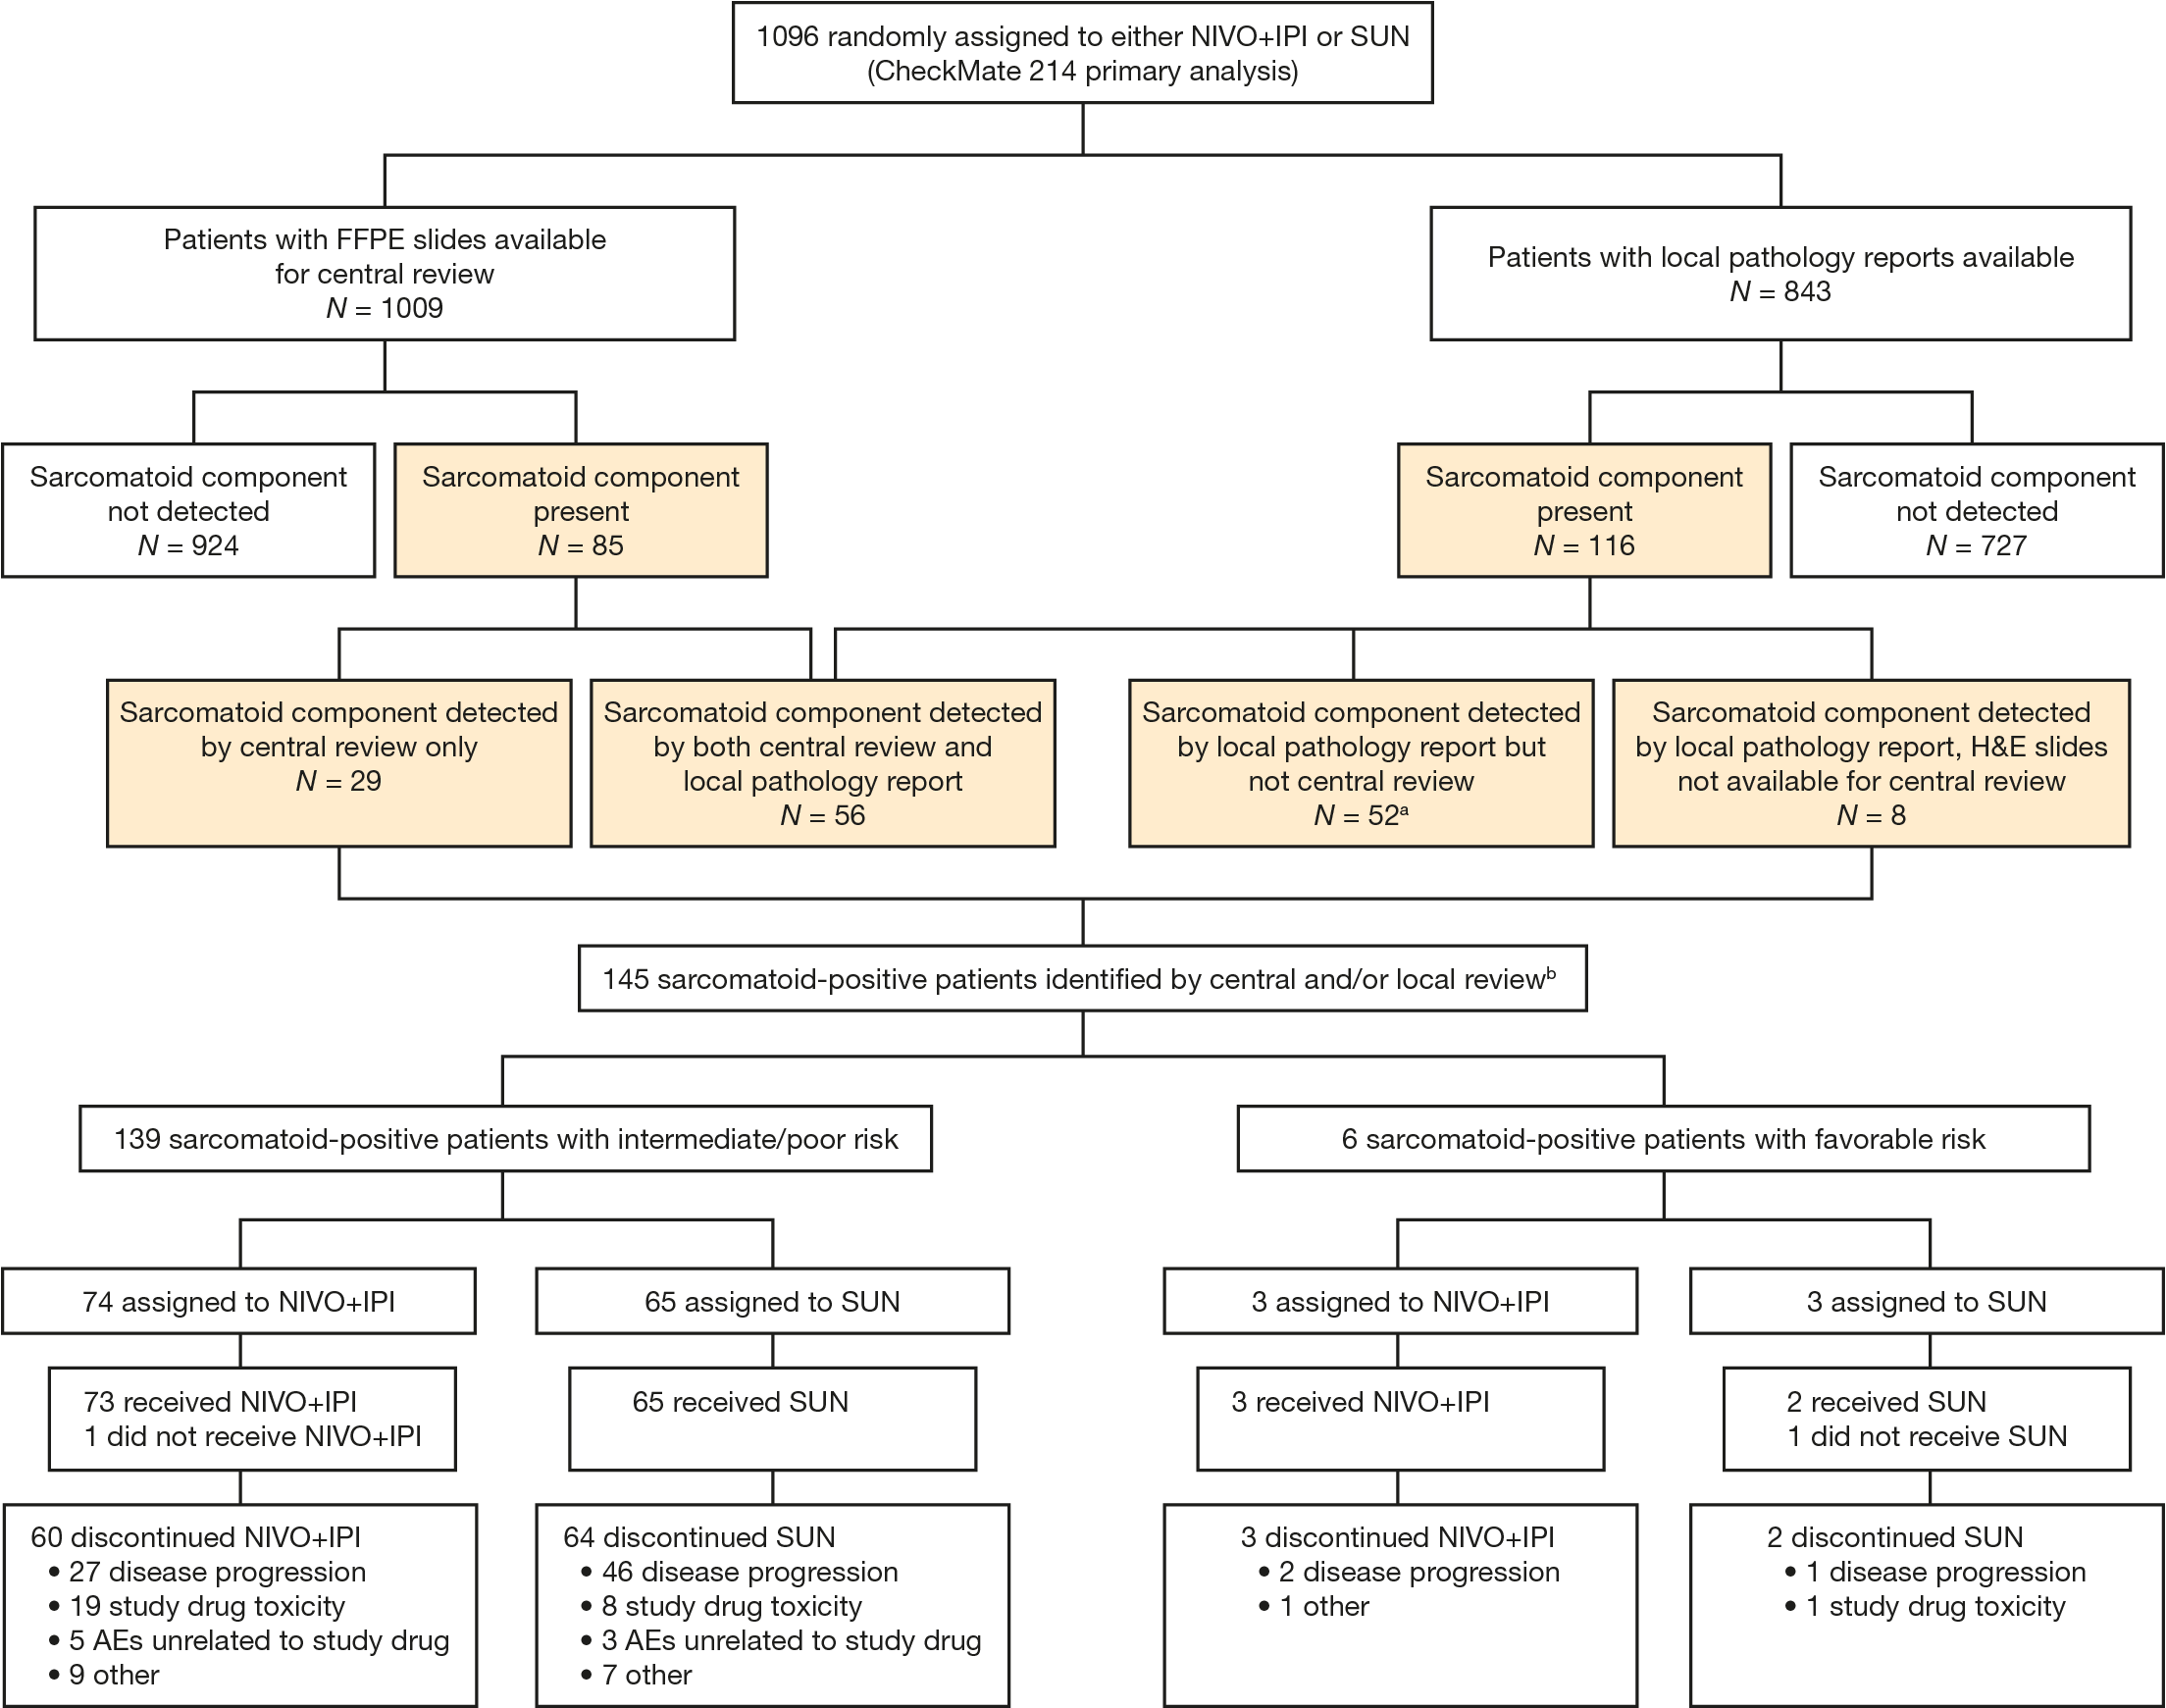


A diagnosis of sarcomatoid-positive renal cell carcinoma was made if any proportion of sarcomatoid component was present. Gray shaded boxes denote patient samples identified as sarcomatoid-positive and included in the present analysis.

aIncludes four patients with N/A results. bIndividual sarcomatoid-positive tumor samples from patients randomized to NIVO+IPI versus SUN comprised primary nephrectomy (93.5% vs. 92.6%) or metastatic biopsy (6.5% vs. 5.9%) sites (tumor sample site not reported for one patient in the SUN group).
H&E, hematoxylin and eosin.
