# Supplementary material for: Efficacy and Safety of Nivolumab Plus Ipilimumab versus Sunitinib in First-line Treatment of Patients with Advanced Sarcomatoid Renal Cell Carcinoma
Source: Oxford University Press journal article supplement (doi:10.1158/1078-0432.ccr-20-2063), 2020-09-01
Supplement: 10780432ccr202063-sup-244195_2_supp_6505248_qf83gm.docx [file 10780432ccr202063-sup-244195_2_supp_6505248_qf83gm.docx]

**Figure S2.**

Treatment-free interval, duration of therapy, duration of response, and subsequent systemic therapy in all patients with sRCC and I/P-risk disease and confirmed response (**A**, complete responders; **B**, partial responders).

Bar indicates time on treatment/treatment-free interval (TFI).

**
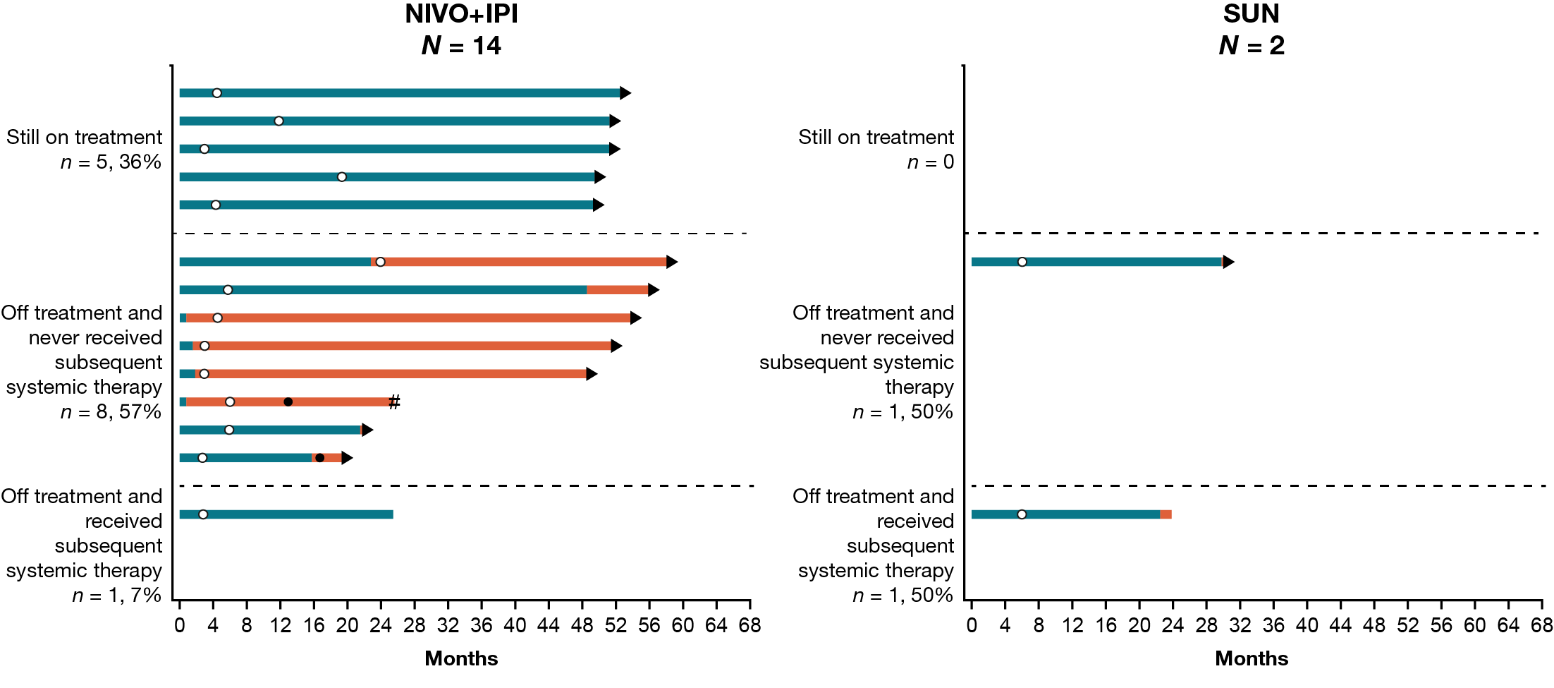
A)**

**B)**

**
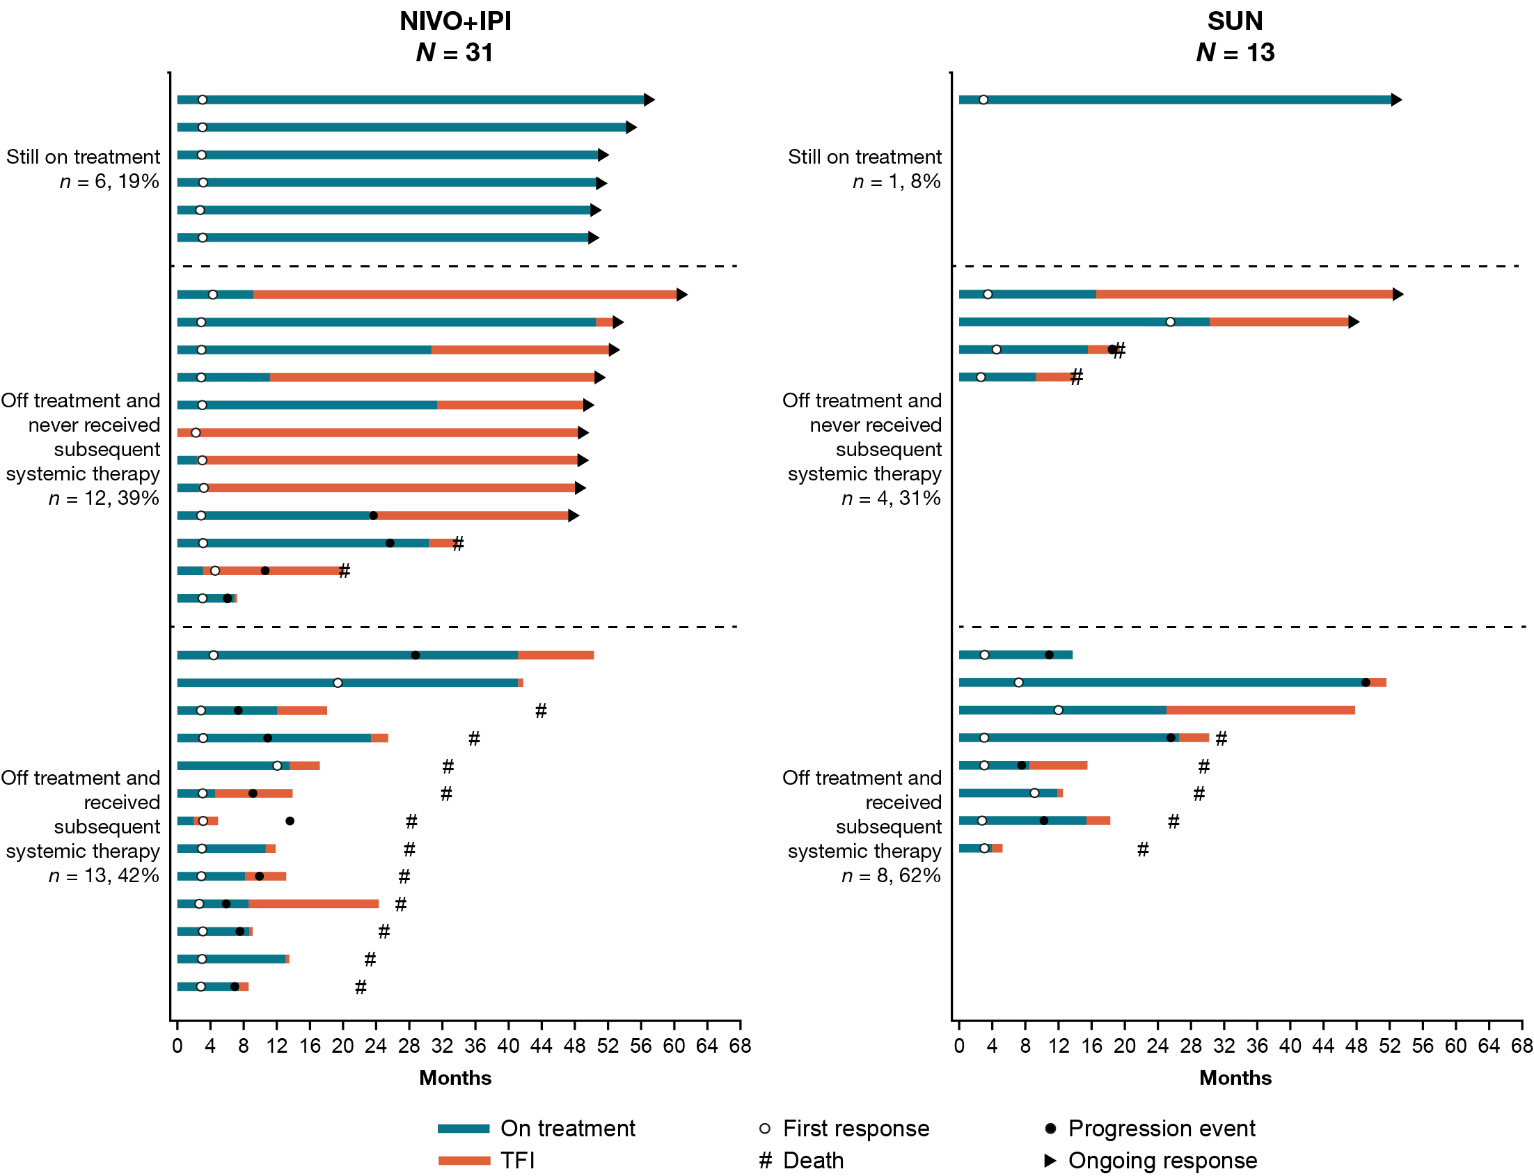
**
